# Supplementary material for: Structure and substrate ion binding in the sodium/proton antiporter PaNhaP
Source: eLife journal article supplement (doi:10.7554/elife.03579), 2014-11-26
Supplement: supp [file elife-03579-supp-v2.zip]

Archive with 11 entries (11 files):
- elife_poa_e03579_Figure_6_figure_supplement_1.pdf
- elife_poa_e03579_Figure_5_figure_supplement_2.pdf
- elife_poa_e03579_Figure_2_figure_supplement_1.pdf
- elife_poa_e03579_Figure_1_figure_supplement_1.pdf
- elife_poa_e03579_Figure_6_figure_supplement_2.pdf
- elife_poa_e03579_Figure_1_figure_supplement_3.pdf
- elife_poa_e03579_Video_1.mp4
- elife_poa_e03579_Figure_5_figure_supplement_1.pdf
- elife_poa_e03579_Figure_8_figure_supplement_1.pdf
- elife_poa_e03579_Figure_1_figure_supplement_2.pdf
- elife_poa_e03579_Video_2.mp4
