# Supplementary figures and images for: Structure and substrate ion binding in the sodium/proton antiporter PaNhaP
Source: eLife journal article supplement (doi:10.7554/elife.03579), 2014-11-26

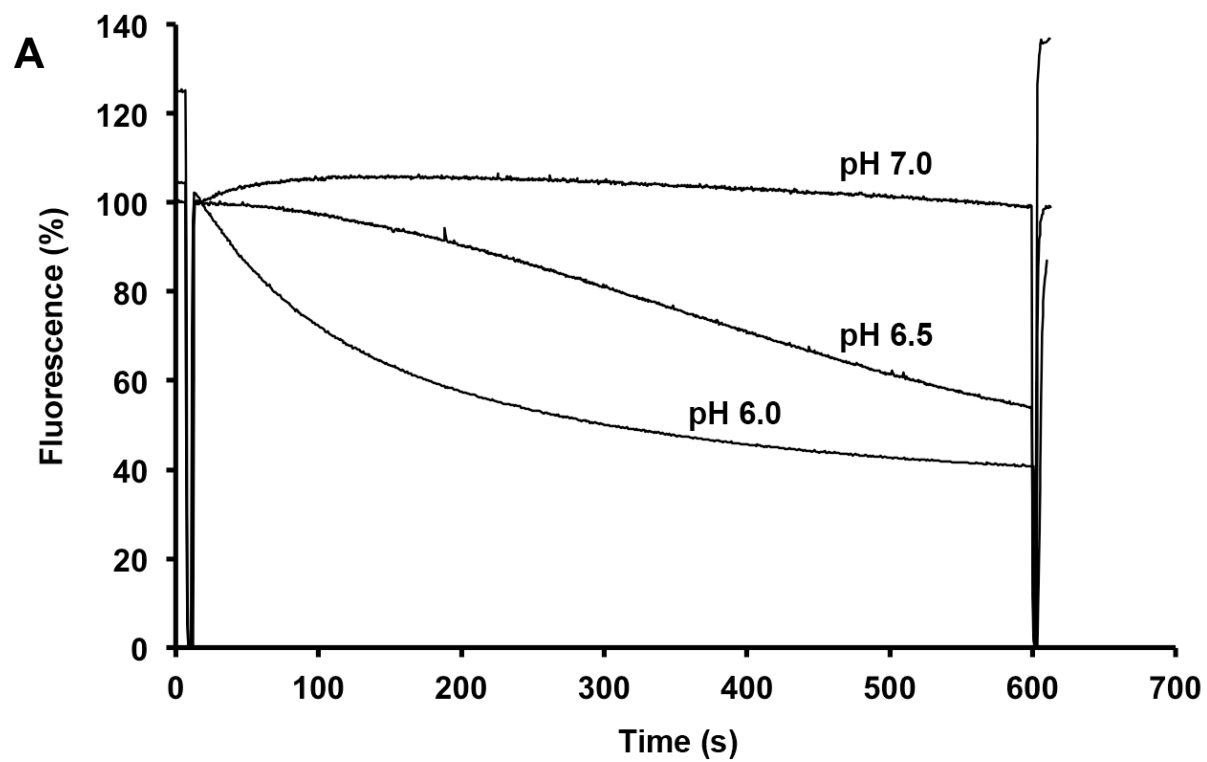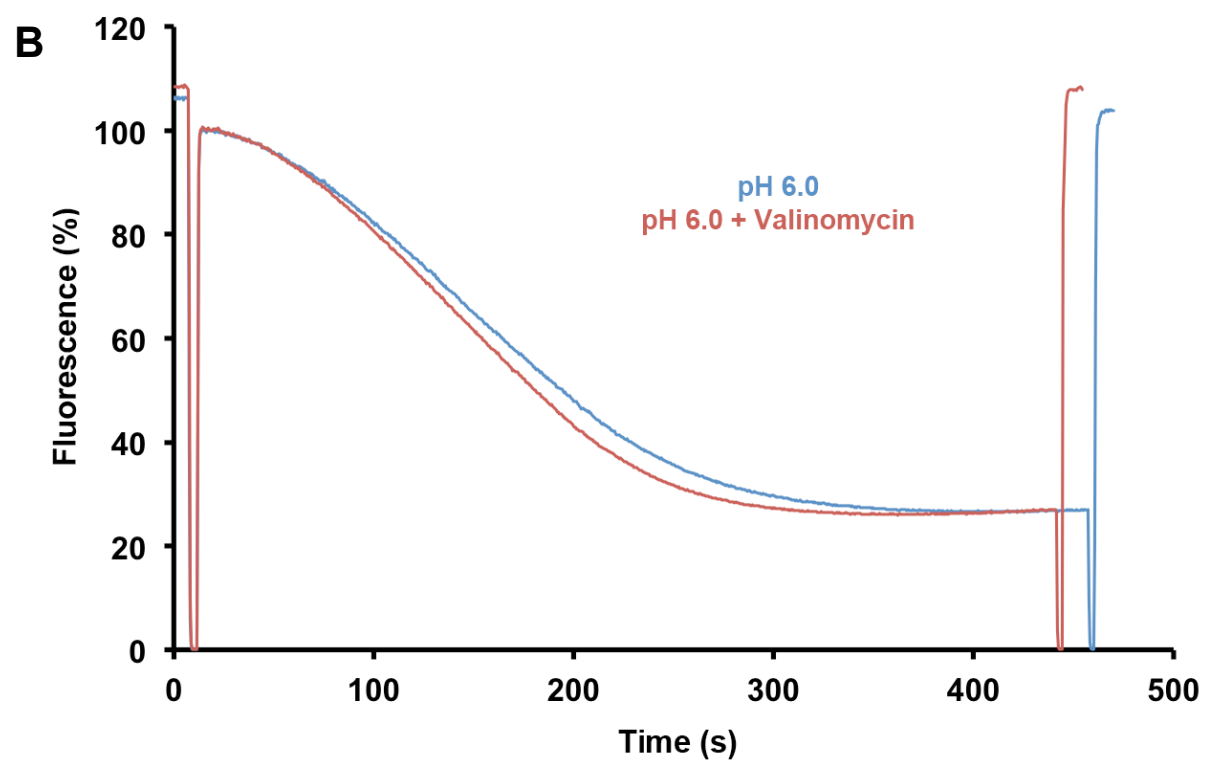

Figure 6 - figure supplement 1

Supplement: supp [file elife-03579-supp-v2.zip › elife_poa_e03579_Figure_6_figure_supplement_1.pdf]

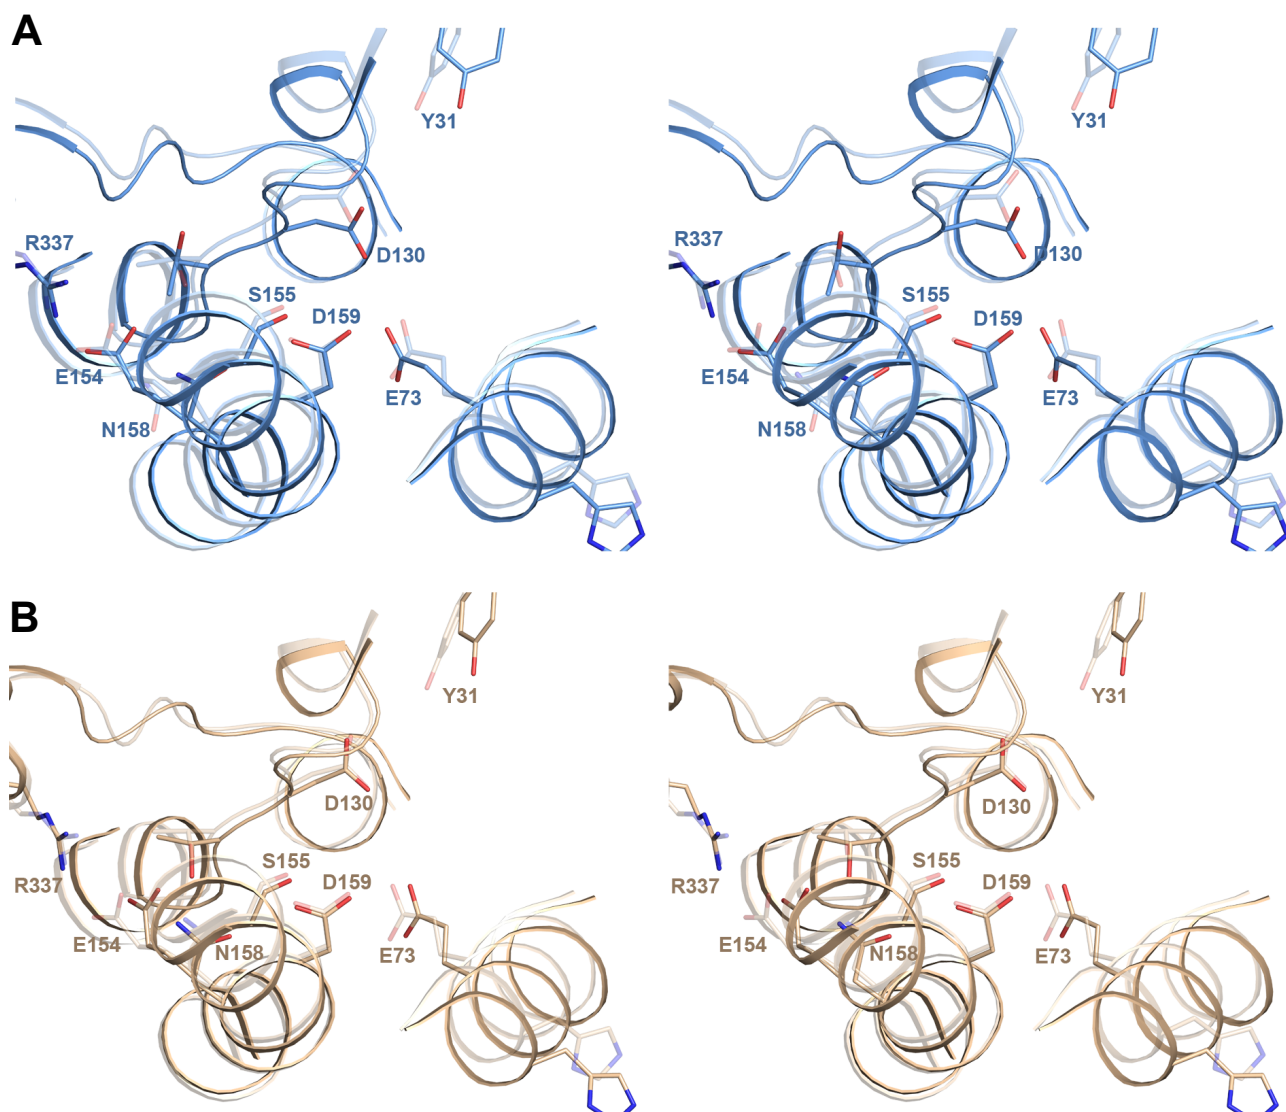

**Figure 5 - figure supplement 2**

Supplement: supp [file elife-03579-supp-v2.zip › elife_poa_e03579_Figure_5_figure_supplement_2.pdf]

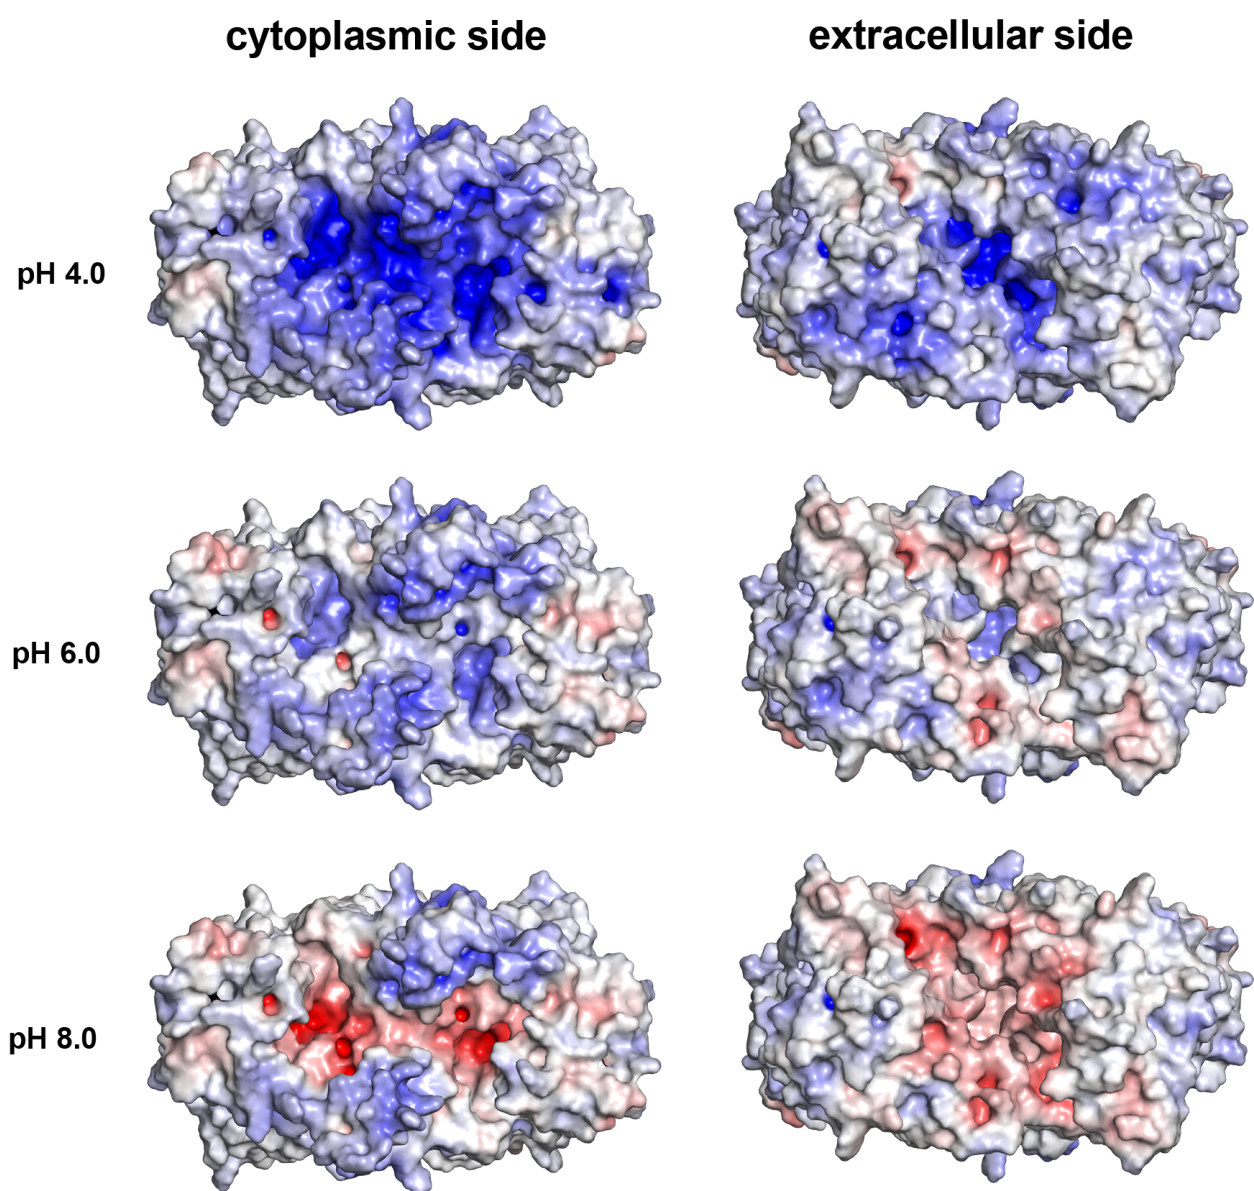

**Figure 2 - figure supplement 1**

Supplement: supp [file elife-03579-supp-v2.zip › elife_poa_e03579_Figure_2_figure_supplement_1.pdf]

**A**

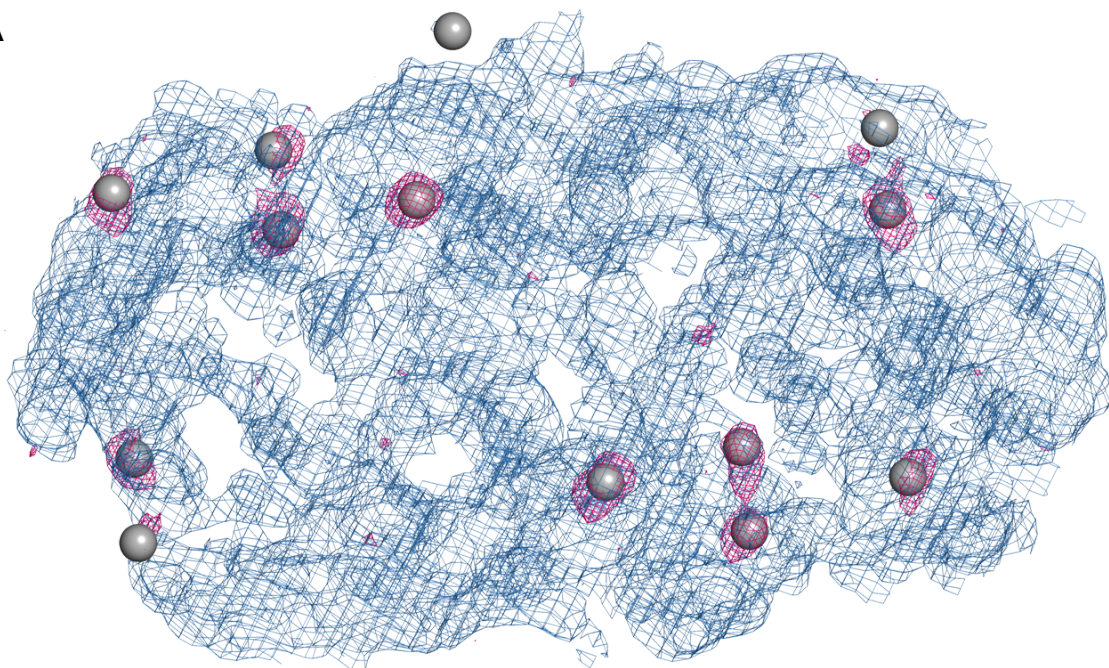

**B**

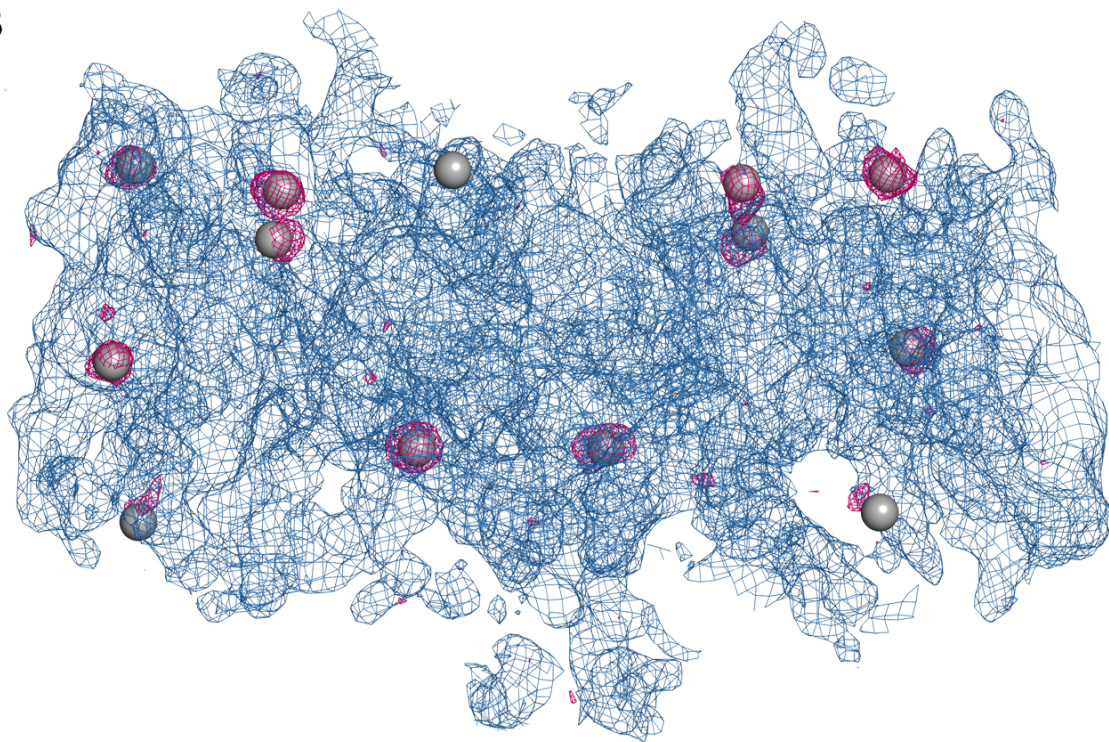

**Figure 1 - figure supplement 1**

Supplement: supp [file elife-03579-supp-v2.zip › elife_poa_e03579_Figure_1_figure_supplement_1.pdf]

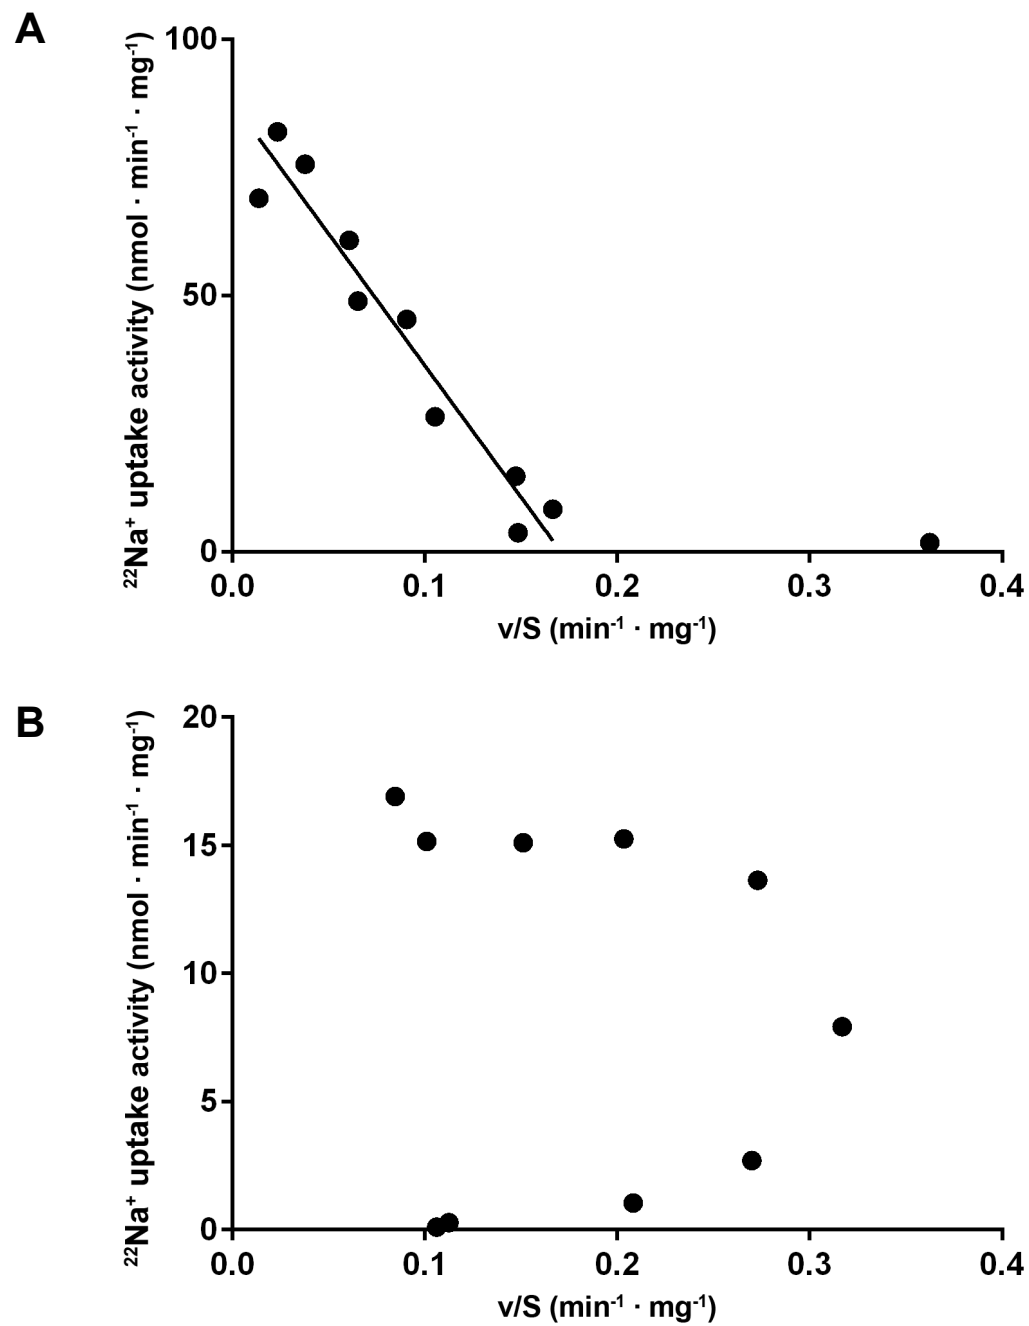

Figure 6 - figure supplement 2

Supplement: supp [file elife-03579-supp-v2.zip › elife_poa_e03579_Figure_6_figure_supplement_2.pdf]

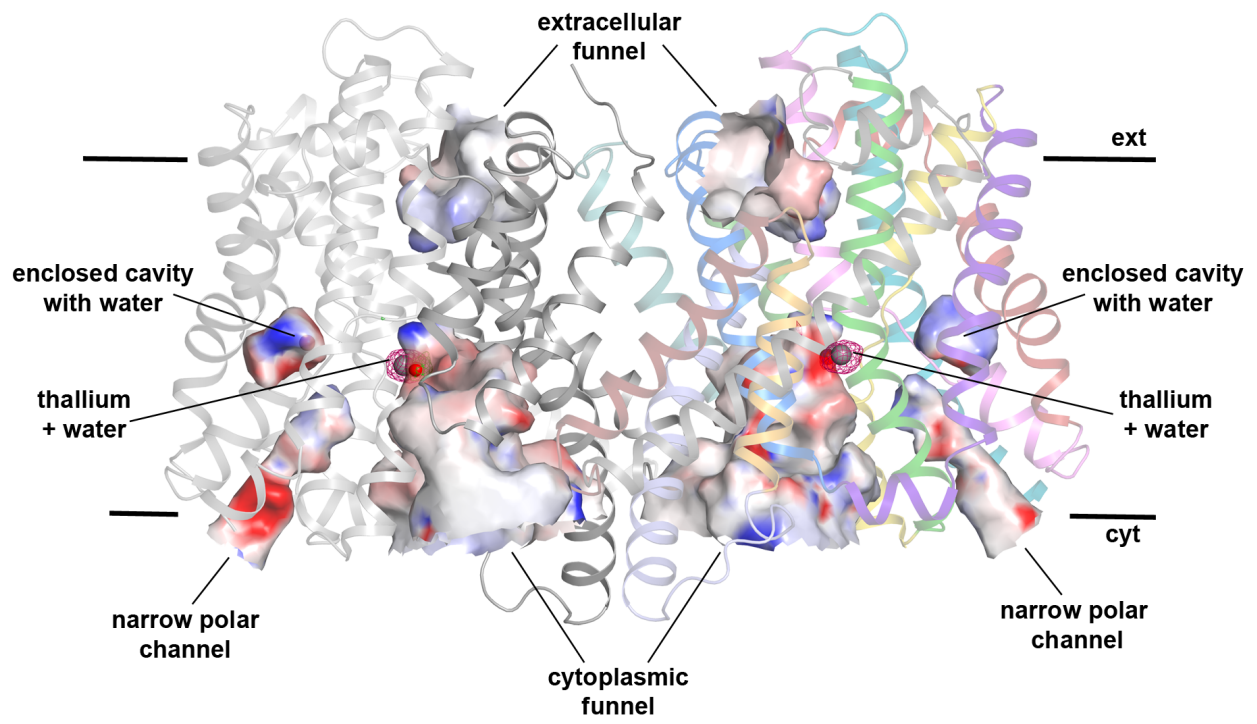

Figure 1 - figure supplement 3

Supplement: supp [file elife-03579-supp-v2.zip › elife_poa_e03579_Figure_1_figure_supplement_3.pdf]

**A**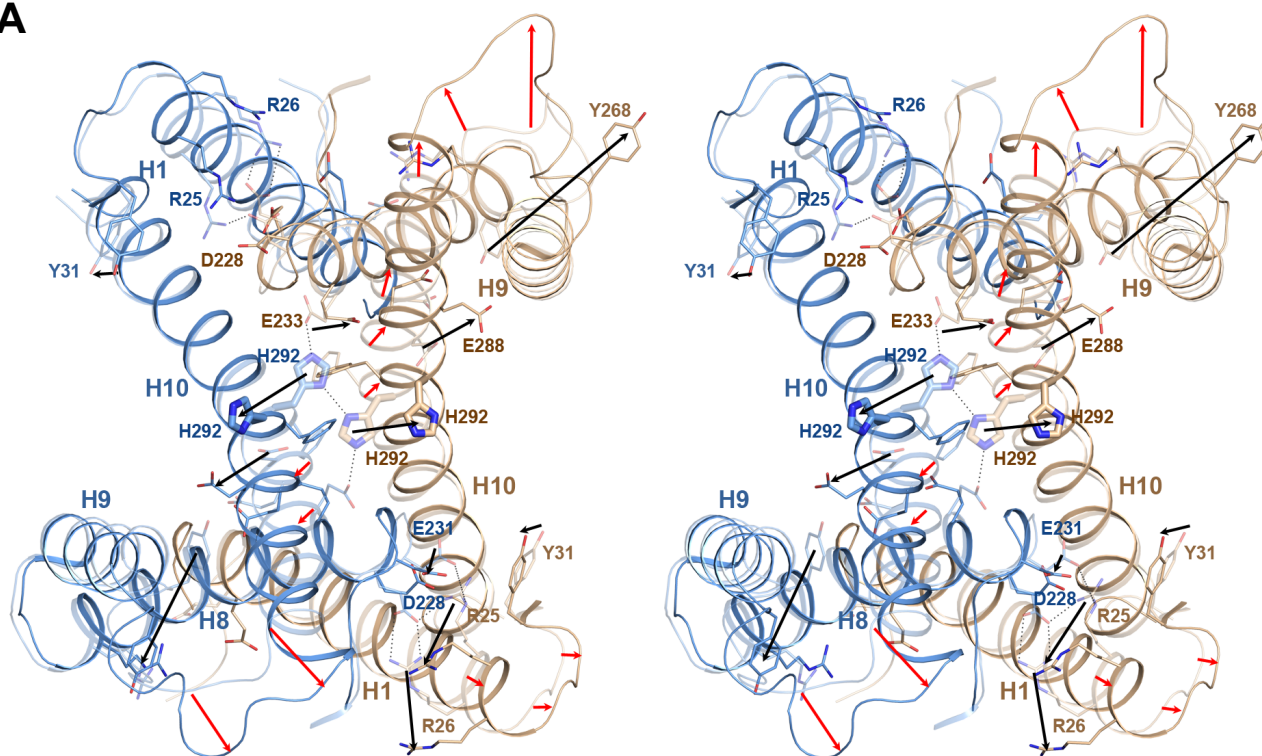**B**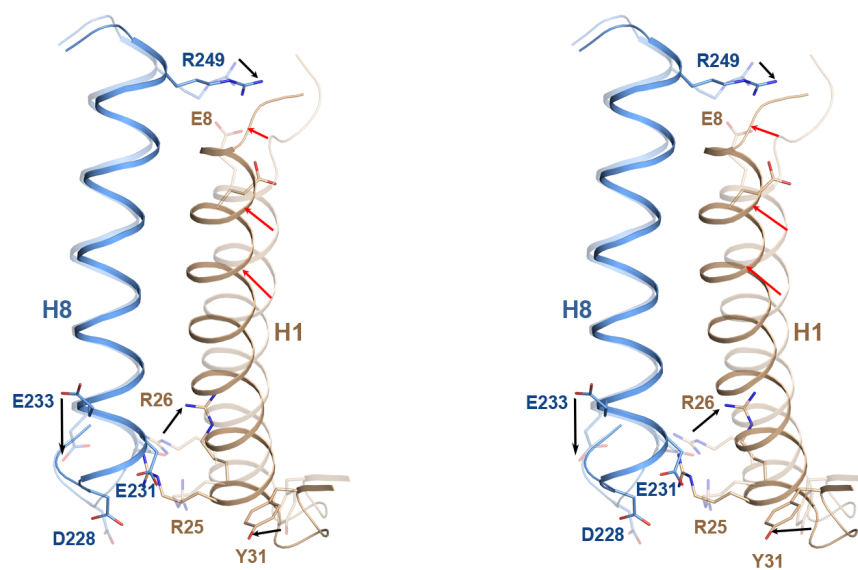

**Figure 5 - figure supplement 1**

Supplement: supp [file elife-03579-supp-v2.zip › elife_poa_e03579_Figure_5_figure_supplement_1.pdf]

**A**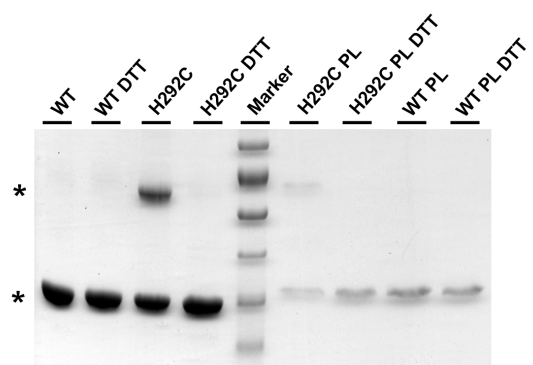**B**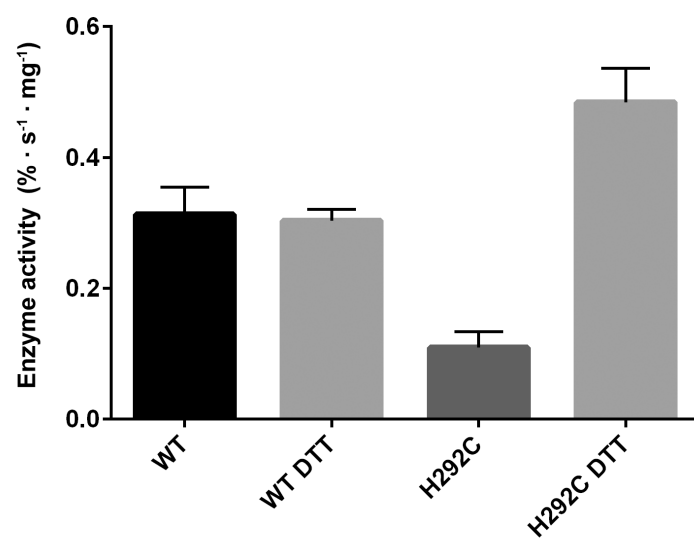

Figure 8 - figure supplement 1

Supplement: supp [file elife-03579-supp-v2.zip › elife_poa_e03579_Figure_8_figure_supplement_1.pdf]

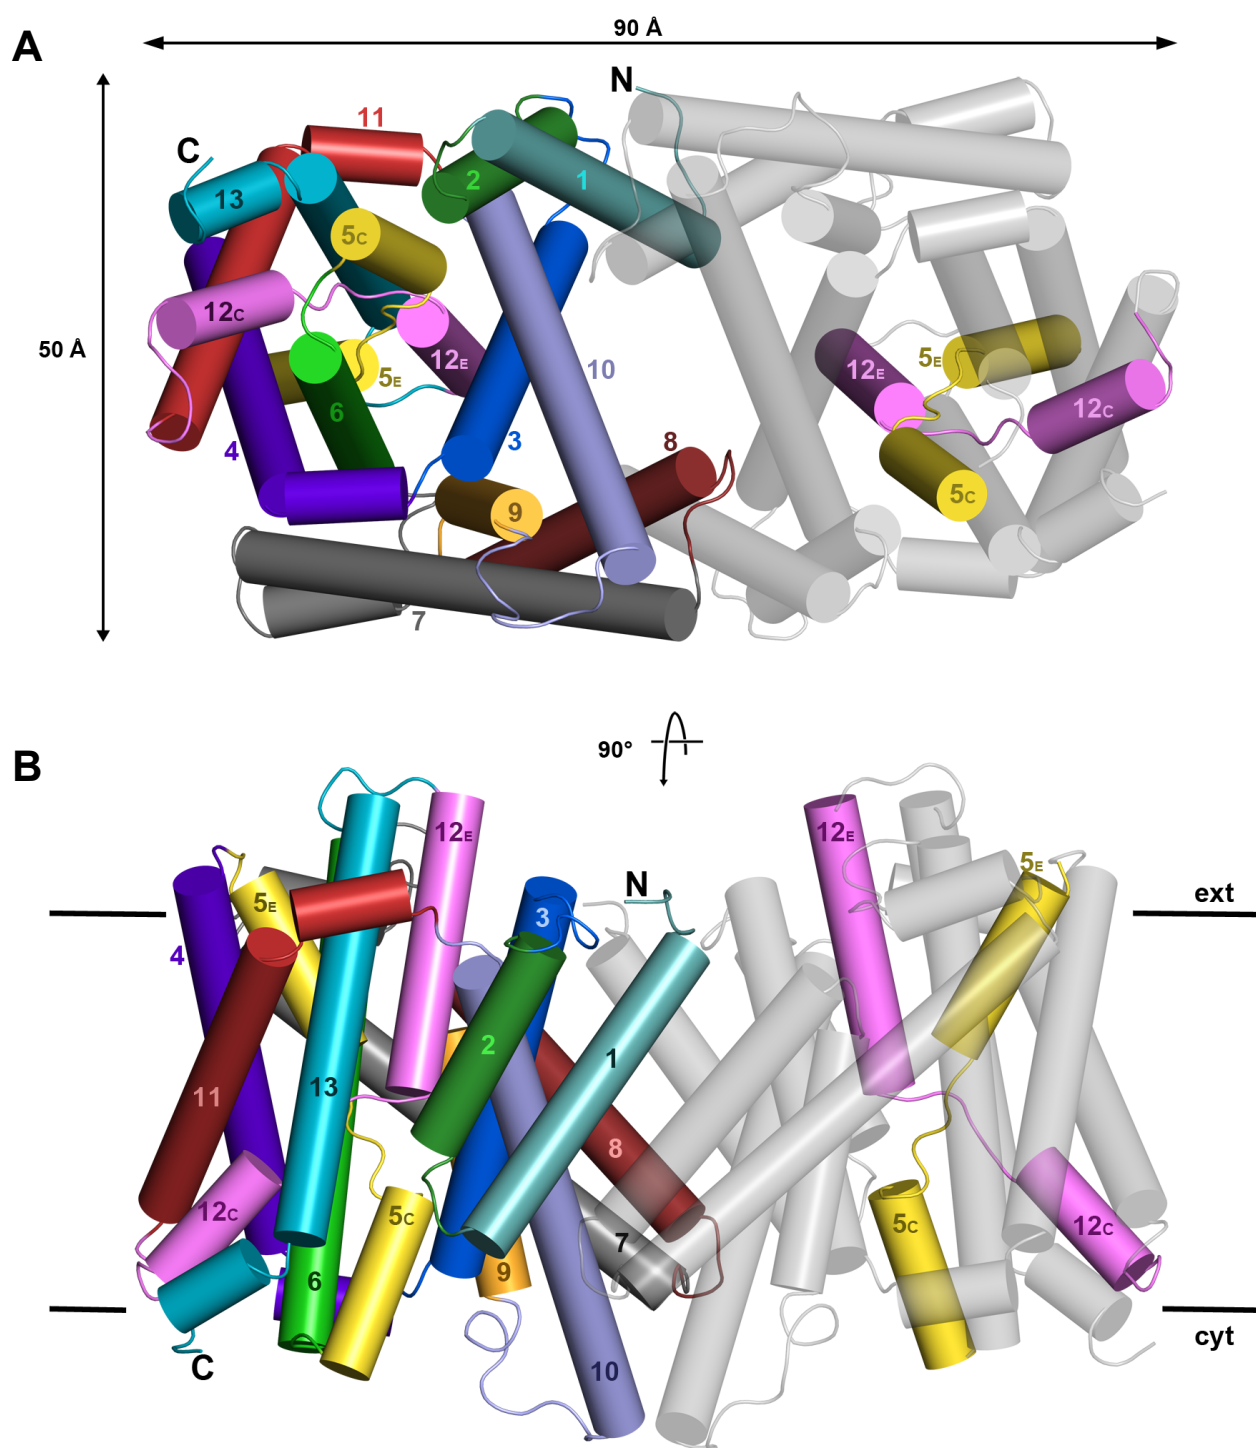

Figure 1 - figure supplement 2

Supplement: supp [file elife-03579-supp-v2.zip › elife_poa_e03579_Figure_1_figure_supplement_2.pdf]
